# Supplementary material for: Ruthenium-doped Ni(OH)2 to enhance the activity of methanol oxidation reaction and promote the efficiency of hydrogen production
Source: Royal Society of Chemistry journal article supplement (doi:10.1039/d4ra02181a), 2024-01-01
Supplement: d4ra02181a1.pdf [file d4ra02181a1.pdf]

## Electronic Supplementary Material

### Ruthenium-doped Ni(OH)<sub>2</sub> to enhance the activity of methanol oxidation reaction and promote the efficiency of hydrogen production

*Jiajie Lin<sup>a</sup>, Jie Chen<sup>a,b</sup>, Changhui Tan<sup>a,b,\*</sup>, Yingzhen Zhang<sup>c,d\*</sup>, Yancai Li<sup>a,b,\*</sup>*

<sup>a</sup> College of Chemistry, Chemical Engineering and Environment, Minnan Normal University,  
Zhangzhou 363000, P. R. China

<sup>b</sup> Fujian Province Key Laboratory of Modern Analytical Science and Separation Technology,  
Minnan Normal University, Zhangzhou 363000, P. R. China

<sup>c</sup> College of Chemical Engineering, Fuzhou University, Fuzhou, 350116, P. R. China

<sup>d</sup> School of Chemistry, Chemical Engineering and Biotechnology, Nanyang Technological  
University, 637457, Singapore

\*Corresponding author: [tanchanghui@mnnu.edu.cn](mailto:tanchanghui@mnnu.edu.cn); 13338287704@163.com;

[liyancai@mnnu.edu.cn](mailto:liyancai@mnnu.edu.cn)

## Materials characterization

Transmission Electron Microscopy (TEM) and EDS elemental mapping were observed by JEM 2100F (Japan) at 200 kV. X-ray diffraction (XRD) was carried out on Rigaku Ultima IV diffractometer (Japan) with Cu K $\alpha$  radiation, scanning speed of 8° min<sup>-1</sup>, and the 2 $\theta$  range 10° - 80°. Scanning electron microscopy (SEM) was performed on Hitachi S-4800 (Japan) to observe the microstructure and morphology details. under an accelerating voltage of 15.0 kV. X-ray Photoelectron Spectroscopy (XPS) was measured by Escalab 250xi with Al K $\alpha$  radiation under the condition of 12.5 kV and 250 W (America), the energy of 284.8 eV is used as the basis for correction. High pressure liquid chromatography (HPLC) was recorded on Agilent1200 (America).

## Instruments and measurements

The electrochemical experiments were investigated on a CH Instruments (CHI 760 E, Shanghai, China) electrochemical workstation, where, the Ru/Ni(OH)<sub>2</sub>/NF was shear into 1 \* 1 cm and straight employed as the working electrode, the counter electrode: graphite rod, reference electrode: 3 M KCl-saturated Ag/AgCl electrode (CH Instruments, CHI 111), and the electrolyte was 1 M KOH (pH = 14) solution. Potentials were calculated used the reversible hydrogen electrode (RHE) scale ( $E$  vs. RHE =  $E_{Ag/AgCl} + 0.059 * pH + 0.197$  V).<sup>1</sup> For MOR and HER, electrochemical impedance spectroscopy (EIS) was used at 100000 Hz and 0.01 Hz at the voltage of 0.5 V vs. RHE (MOR) and -1.12 V vs. RHE (HER), respectively, and an amplitude of 5 mV. Estimated electrochemical double layer capacitance ( $C_{dl}$ ) was obtained by the cyclic voltammetry (CV) testing in the non-Faraday region between -0.05 V and -0.15 V vs. Ag/AgCl with the scan rates from 20 mV s<sup>-1</sup> to 100 mV s<sup>-1</sup>. For HER, the CV cycling

stability were swept between 0 ~ -0.8 V vs. RHE at a scan rate of 0.1 V·s<sup>-1</sup>. The linear sweep voltammetry (LSV) were recorded at a scan rate of 5 mV s<sup>-1</sup>. The *i*-*t* curves of HER and MOR were tested at potentials of -1.07 V and 0.34 V, respectively. All the electrochemical measurements were proceeded at room temperature of 25° C.

In 1 M KOH with 1 M MeOH at room temperature, the as-synthesized Ru/Ni(OH)<sub>2</sub>/NF (1×1 cm) was used cathode and anode to investigate the performance of MOR coupled with HER in a single-chamber membrane-less cell, and the electrolyte was 20 mL KOH solution. The polarization curves were collected by linear sweep voltammetry from 1 V to 2 V at a scan rate of 5 mV s<sup>-1</sup>. The *i*-*t* measurement at a voltage of 2.1 V, H<sub>2</sub> production was collected by the water displacement method with a 100 mL graduated cylinder.

All electrochemical tests were not *i*R corrected.

### **Calculation of product (H<sub>2</sub> or formate) yield and faradaic efficiency**

The Faraday efficiency (%) of the H<sub>2</sub> and formate can be determined by the following equation:<sup>2,3</sup>

$$FE = V_{(measured)} / V_{(calculated)}$$

Where *V (measured)* is the experimentally collected gas yield by water displacement method, and *V (calculated)* is the theoretical gas yield, which is calculated as follow:

$$V (Calculated) = V_m * [Q / (n * F)]$$

$$FE = (N \times Z \times F / Q) \times 100\%$$

where *N* is the mole of product (H<sub>2</sub> or formate) reduced, *V<sub>m</sub>* is the gas molar volume of 24.5 mol L<sup>-1</sup> at room temperature and pressure, *Q* is the passed charge, *F* is the Faraday constant (96 485 C mol<sup>-1</sup>), and *Z* is the number of electrons transferred for a mole of H<sub>2</sub> (*Z* = 2) and

formate ( $Z = 4$ ) formation.

### **Energy Consumption Efficiency:<sup>3</sup>**

$W = U \times I \times t = U \times Q$ , where  $U$  is the applied voltage (V),  $I$  is the current (A),  $t$  is the time (s), and  $Q$  is the passed charge (C). When producing the same amount of hydrogen by HER and MOR and HER and OER (consumed the same  $Q$ ), the required electrical energy of former is  $W_1 = U_1 \times Q_1$ , while the latter is  $W_2 = U_2 \times Q_2$ . So  $W_1 / W_2 = U_1 / U_2$ . The energy consumption saving is equal to  $(U_2 - U_1) / U_2 \times 100\%$ .

### **Calculation of ECSA:**

$ECSA = C_{dl} / C_s \times 1$ , (the specific capacitance ( $C_s$ ) was taken as  $0.060 \text{ mF cm}^{-2}$ ),<sup>4</sup> the geometric area of the working electrode is  $1 \text{ cm}^2$ ), Current density differences ( $\Delta j / 2 = j_a - j_c$ ) at  $-0.01 \text{ V}$  (vs. Ag/AgCl) were plotted against scan rates, the linear slope was used to represent  $C_{dl}$ .

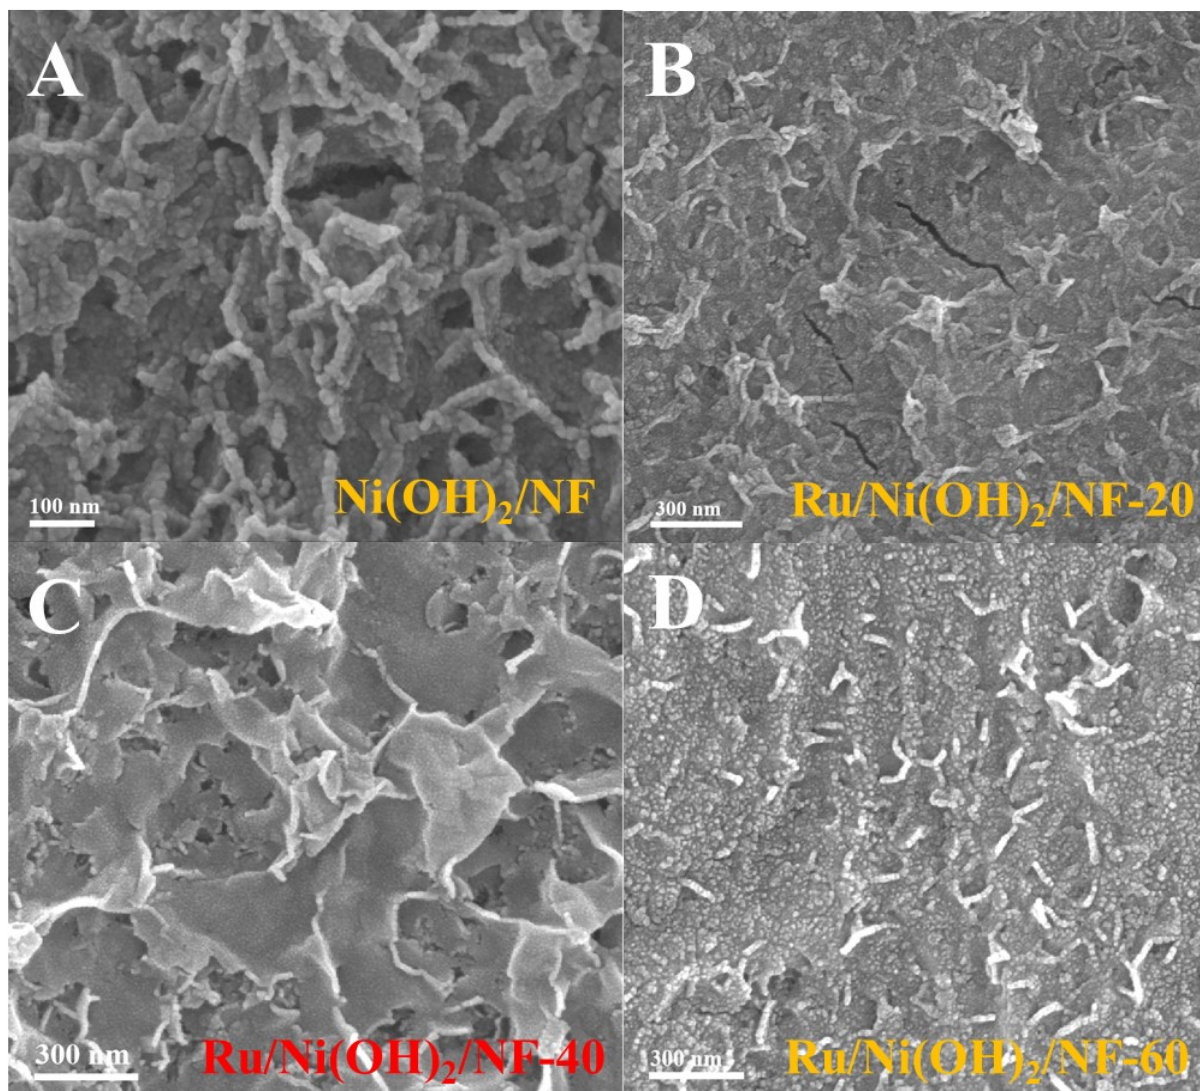

**Fig. S1.** The SEM image of the Ni(OH)<sub>2</sub>/NF (A), Ru/Ni(OH)<sub>2</sub>/NF-20 (B), Ru/Ni(OH)<sub>2</sub>/NF-40 (C), Ru/Ni(OH)<sub>2</sub>/NF-60 (D).

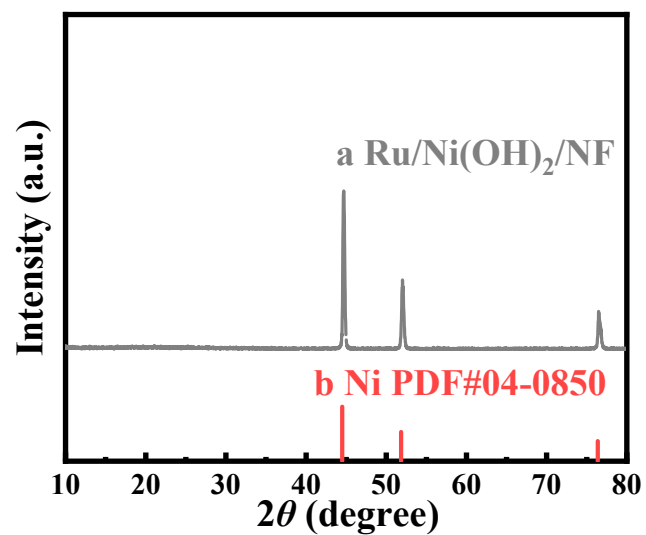

Fig. S2. (A) The XRD patterns of the Ru/Ni(OH)<sub>2</sub>/NF.

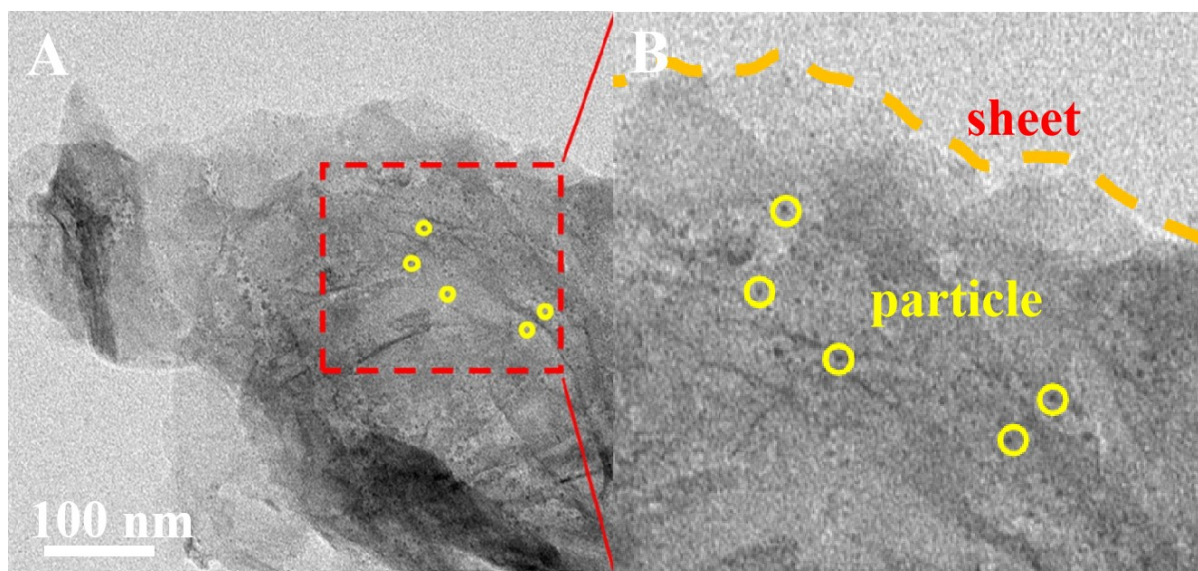

Fig. S3. The HRTEM image of the Ru/Ni(OH)<sub>2</sub>/NF.

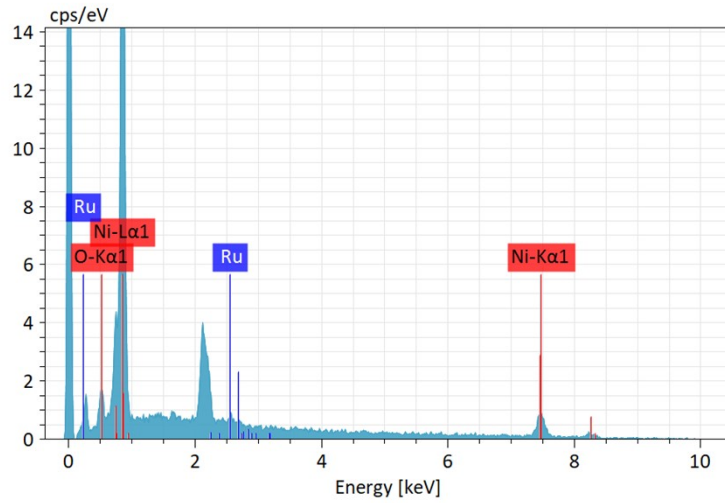

**Fig. S4.** The EDS image of the Ru/Ni(OH)<sub>2</sub>/NF

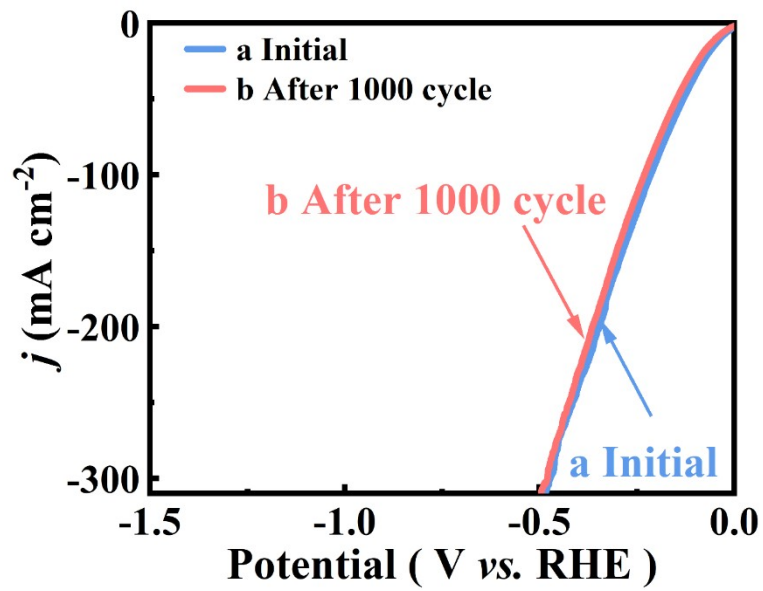

**Fig. S5.** The LSV curves of the Ru/Ni(OH)<sub>2</sub>/NF before (a) and after (b) 1000 CV cycles.

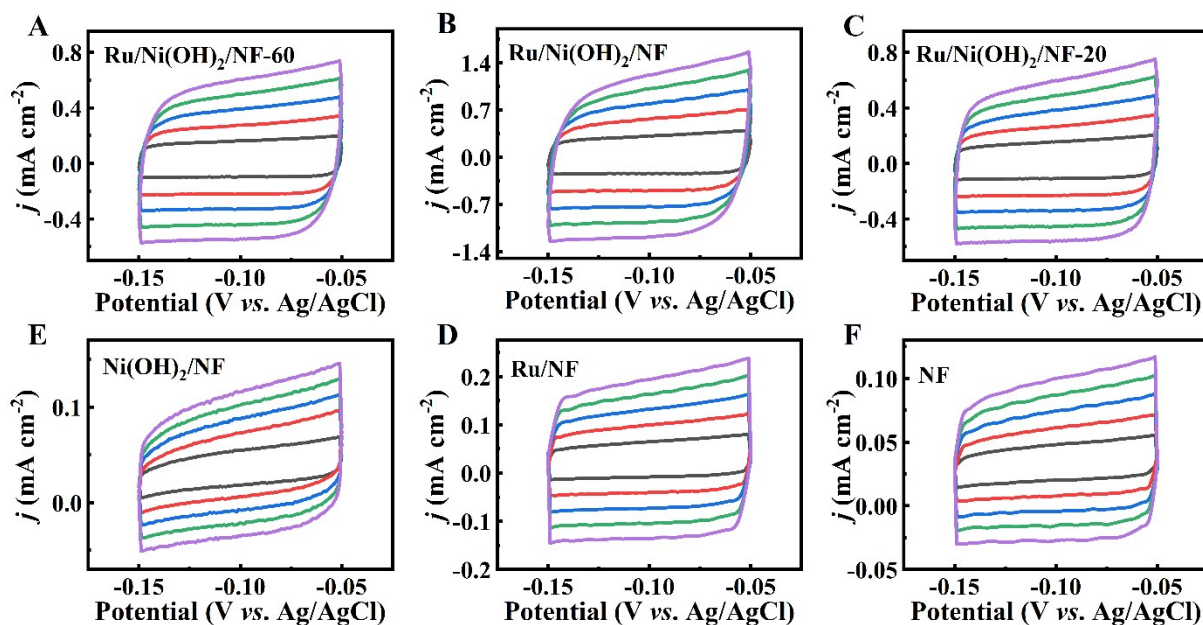

**Fig. S6.** (A-F) The CV tests of different catalysts, the scanning rates range (20 ~ 100 mV s<sup>-1</sup>) in 1 M KOH.

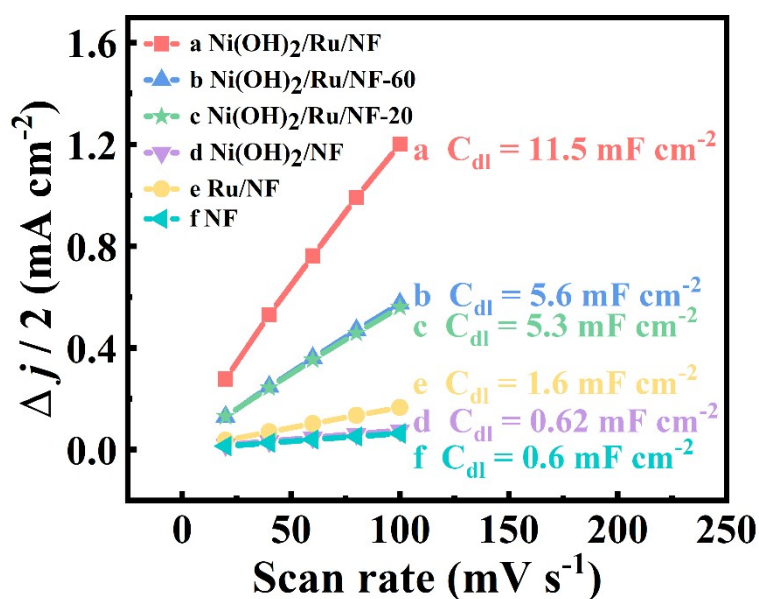

**Fig. S7.** The corresponding  $C_{dl}$  value comparison of the Ru/Ni(OH)<sub>2</sub>/NF (a), the Ru/Ni(OH)<sub>2</sub>/NF-60 (b), the Ru/Ni(OH)<sub>2</sub>/NF-20 (c), the Ni(OH)<sub>2</sub>/NF (d), the Ru/NF (e) and the NF (f) in 1 M KOH.



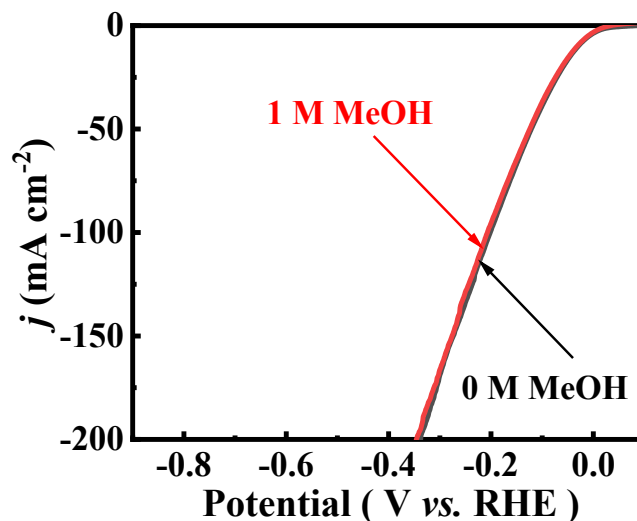

Fig. S8. The LSV curves of the Ru/Ni(OH)<sub>2</sub>/NF in 1 M KOH with 1 M methanol.

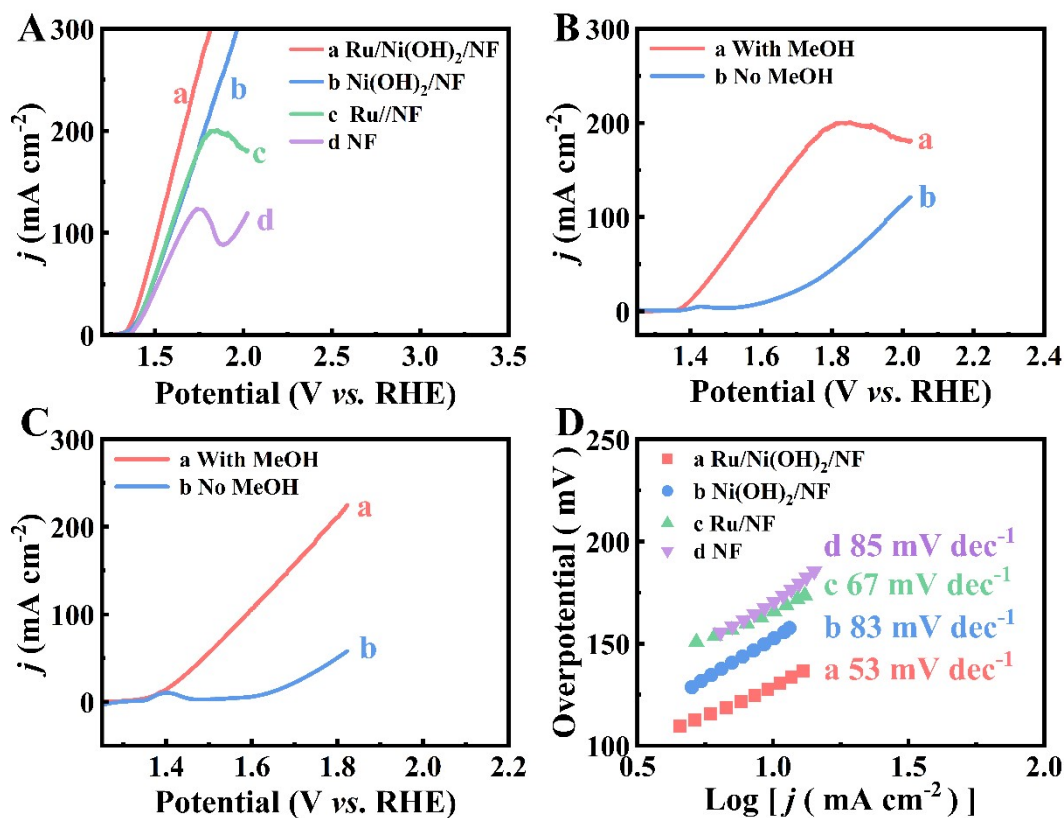

Fig. S9. (A) The LSV curves of the Ru/Ni(OH)<sub>2</sub>/NF (a), the Ni(OH)<sub>2</sub>/NF (b), the Ru/NF(c), the NF (d) in 1 M KOH with 1 M MeOH. (B) The LSV curves of the Ru/NF and (C) the Ni(OH)<sub>2</sub>/NF in 1 M KOH with (a) and without (b) 1 M methanol. (D) Tafel plots of the Ru/Ni(OH)<sub>2</sub>/NF (a) , the Ni(OH)<sub>2</sub>/NF (b), the Ru/NF(c), the NF (d) in 1 M KOH with 1 M MeOH.

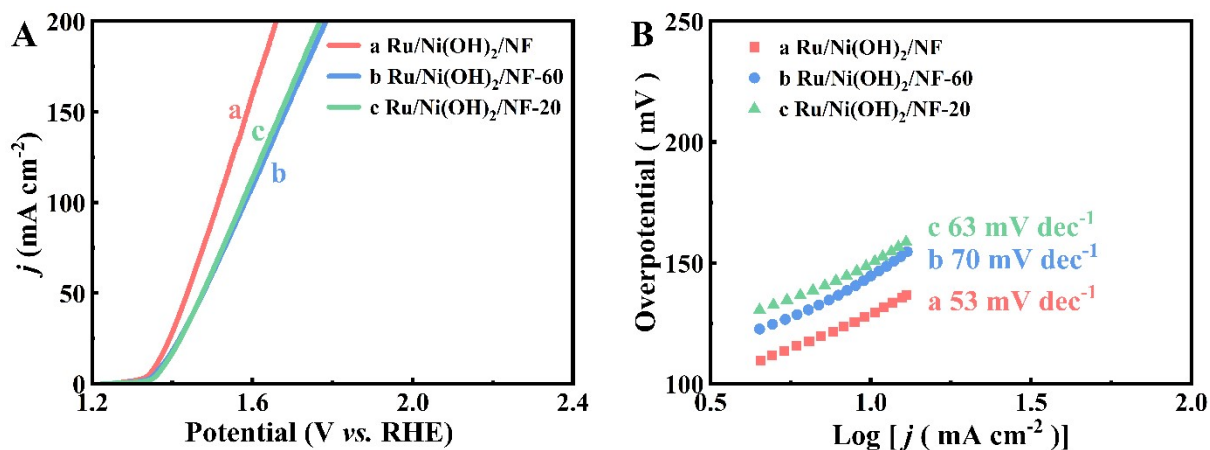

**Fig. S10.** (A) The LSV curves and (B) Tafel plots of the Ru/Ni(OH)<sub>2</sub>/N (a), the Ru/Ni(OH)<sub>2</sub>/NF-60 (b), the Ru/Ni(OH)<sub>2</sub>/NF-20 (c) in 1 M KOH with 1 M MeOH.

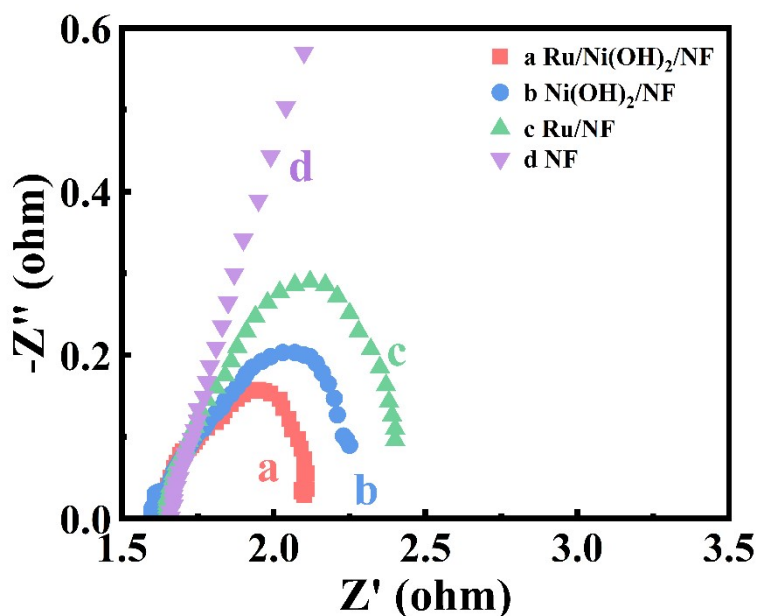

**Fig. S11.** The electrochemical impedance spectroscopy (EIS) analyses of the catalysts for methanol oxidation. Nyquist plots of the Ru/Ni(OH)<sub>2</sub>/NF (a), the Ni(OH)<sub>2</sub>/NF (b), the Ru/NF (c) and the NF (d) for methanol electro-oxidation process in 1 M KOH with 1 M methanol.

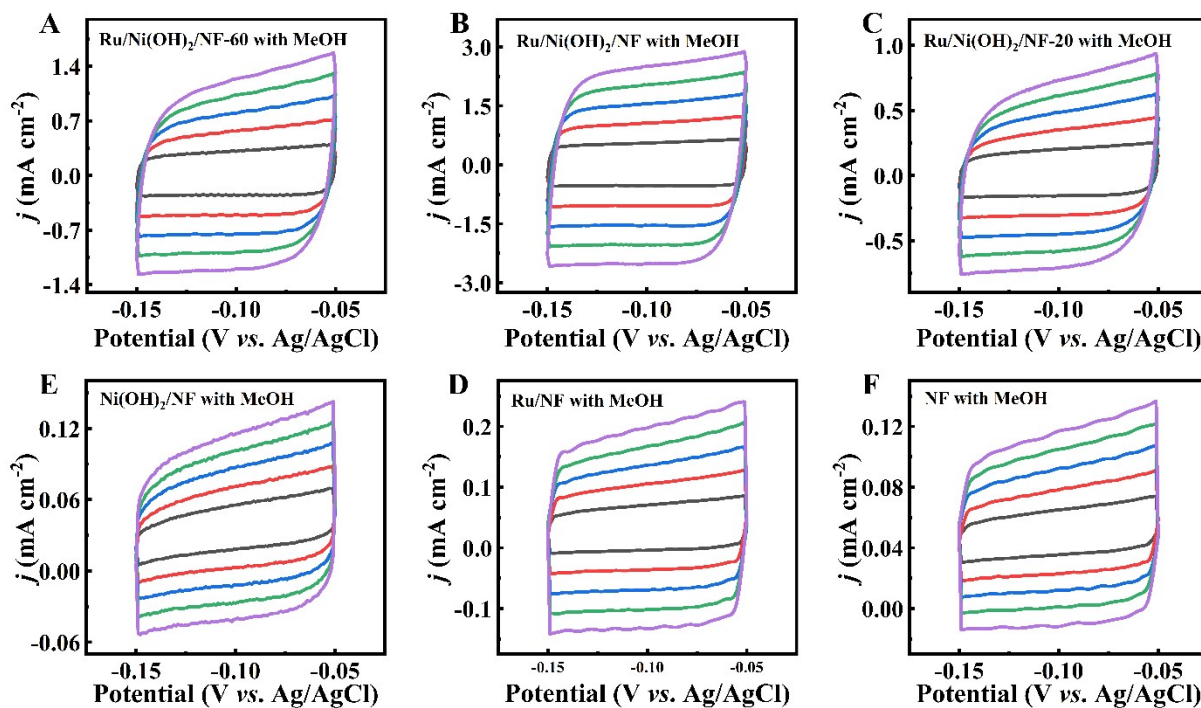

**Fig. S12.** (A-F) The CV tests of different catalysts, the scanning rates range ( $20 \text{ mV s}^{-1} \sim 100 \text{ mV s}^{-1}$ ) in 1 M KOH with 1 M methanol.

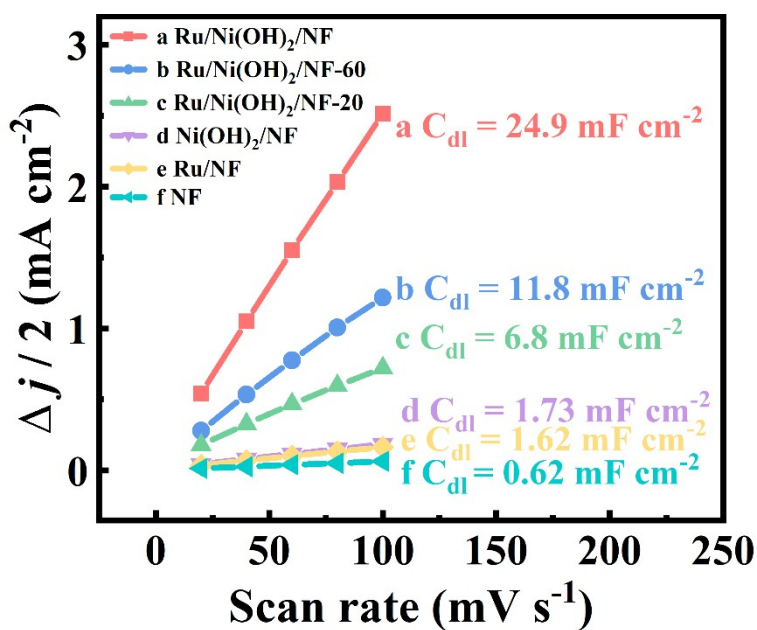

**Fig. S13.** The corresponding  $C_{dl}$  value comparison of the Ru/Ni(OH)<sub>2</sub>/NF (a), the Ru/Ni(OH)<sub>2</sub>/NF-60 (b), the Ru/Ni(OH)<sub>2</sub>/NF-20 (c), the Ni(OH)<sub>2</sub>/NF (d), the Ru/NF (e), and the NF (f) in 1 M KOH with 1 M MeOH.

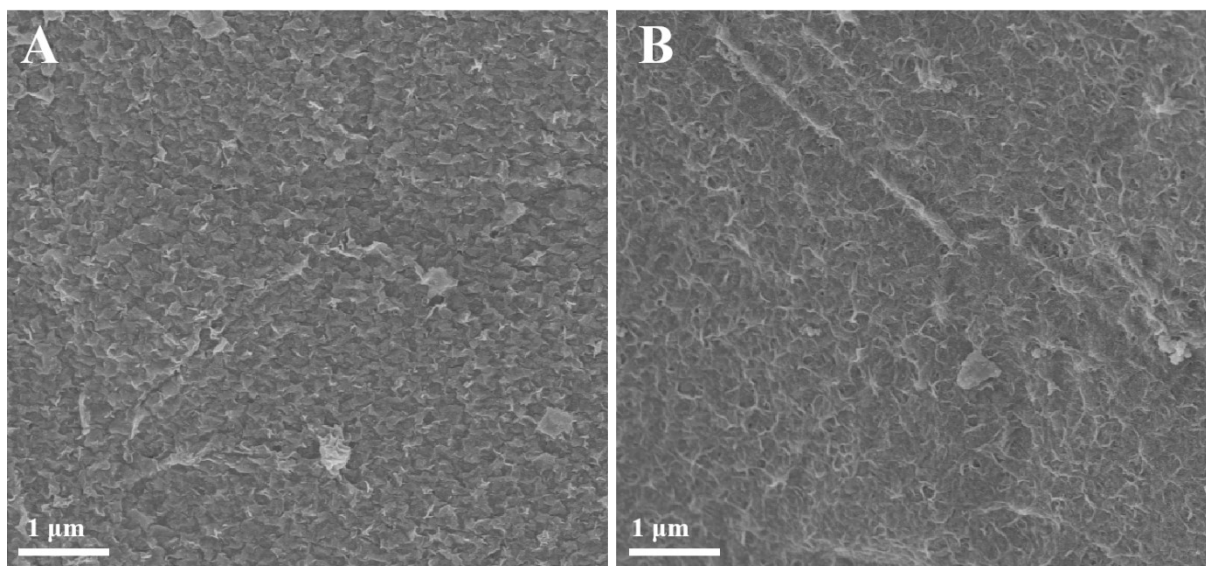

**Fig. S14** The SEM images of the Ru/Ni(OH)<sub>2</sub>/NF after 1000 cycles of CV cycle stability of HER (A) and MOR test (B).

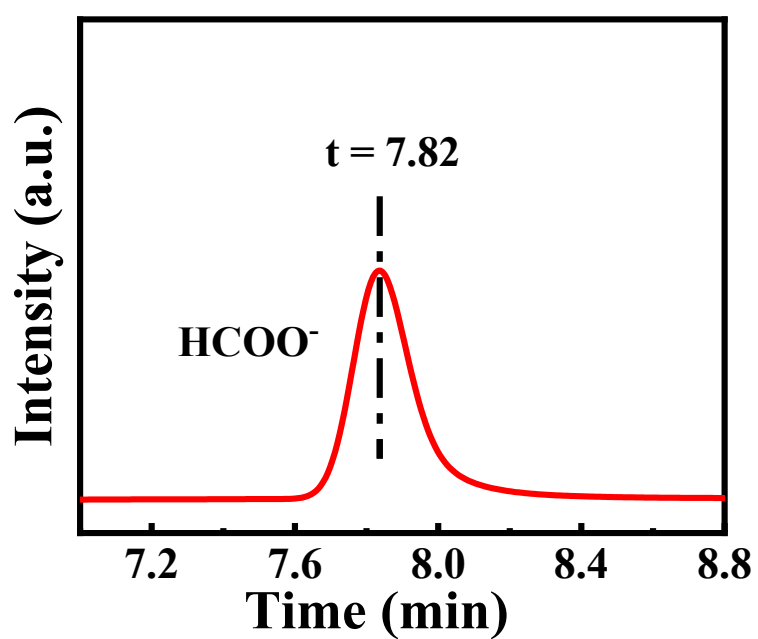

**Fig. S15.** Formate standard materials were tested on the HPLC.

**Table S1.** Comparison of the HER performances of various catalysts in 1 M KOH.

| Catalysts                       | iR compensation | Electrode | Overpotentia (mV) @ 10 mA/cm <sup>2</sup> | Ref.             |
|---------------------------------|-----------------|-----------|-------------------------------------------|------------------|
| <b>Ru/Ni(OH)<sub>2</sub>/NF</b> | <b>0%</b>       | <b>NF</b> | <b>42</b>                                 | <b>This work</b> |
| MoP-Ru <sub>2</sub> P/NPC       | 95%             | GCE       | 47                                        | 5                |
| Ru/Ni(OH) <sub>2</sub> /TM-0.2  | 95%             | Ti mesh   | 135                                       | 6                |
| (Ru-Co)O <sub>x</sub> /CC       | 95%             | CC        | 44.1                                      | 7                |
| CoSA-NC@Ru                      | 95%             | CC        | 14                                        | 8                |
| Ru/Ni(OH) <sub>2</sub> /NF      | 95%             | NF        | 25                                        | 9                |
| Ru/Ni(OH) <sub>2</sub>          | 80%             | CP        | 31                                        | 10               |
| R-NiRu/NF                       | 95%             | NF        | 16                                        | 11               |
| Ru-NC-700                       | 85%             | GCE       | 47                                        | 12               |

**Table S2.** Representative electrochemical reforming of the MOR.

| catalysts                             | Electrolyte                                  | Main anode product               | Cell voltage at 10 mA cm <sup>-2</sup> (V) | Ref.             |
|---------------------------------------|----------------------------------------------|----------------------------------|--------------------------------------------|------------------|
| <b>Ru/Ni(OH)<sub>2</sub>/NF</b>       | <b>1 M KOH +<br/>1 M methanol</b>            | <b>formate</b>                   | <b>1.36</b>                                | <b>this work</b> |
| NiMoO/NF                              | 1 M KOH +<br>0.5 M Urea                      | N <sub>2</sub> , CO <sub>2</sub> | 1.37                                       | 13               |
| CoCu-UMOF Ns                          | 1 M KOH +<br>3 M methanol                    | formate                          | 1.365                                      | 14               |
| Co <sub>3</sub> O <sub>4</sub> NSs/CP | 1 M KOH +<br>1 M Ethanol                     | Ethyl acetate                    | 1.445                                      | 15               |
| Co <sub>3</sub> O <sub>4</sub> NWS/CC | 1 M KOH +<br>40 mg L <sup>-1</sup> triclosan | Phenol                           | 1.54                                       | 16               |
| Ni-MOF                                | 1 M KOH +<br>0.33 M Urea                     | N <sub>2</sub> , CO <sub>2</sub> | 1.36                                       | 17               |
| NF-Pt/C                               | 1 M KOH +<br>0.5 M Urea                      | N <sub>2</sub> , CO <sub>2</sub> | 1.48                                       | 18               |
| Co@NPC-800                            | 1 M KOH +<br>0.1 M glucose                   | formate                          | 1.46                                       | 19               |

**Table S3.** Comparison of the chemical-assisted hydrogen evolution reaction performance.

| Bifunctional catalysts                                      | Electrolyte                       | Main anode product               | Cell voltage at 10 mA cm <sup>-2</sup> (V) | Ref.             |
|-------------------------------------------------------------|-----------------------------------|----------------------------------|--------------------------------------------|------------------|
| <b>Ru/Ni(OH)<sub>2</sub>/NF</b>                             | <b>1 M KOH +<br/>1 M methanol</b> | <b>formate</b>                   | <b>1.45</b>                                | <b>this work</b> |
| Pd/Ni(OH) <sub>2</sub> @C/NF                                | 1 M KOH +<br>1 M ethanol          | -                                | 1.49                                       | 20               |
| Co-Rh <sub>2</sub>                                          | 1 M KOH +<br>1 M methanol         | formate                          | 1.55                                       | 21               |
| Ni(OH) <sub>2</sub> /NF                                     | 1 M KOH +<br>0.5 M methanol       | formate                          | 1.52                                       | 22               |
| MnO <sub>2</sub> /MnCo <sub>2</sub> O <sub>4</sub> /Ni      | 1 M KOH +<br>0.5 M Urea           | N <sub>2</sub> , CO <sub>2</sub> | 1.58                                       | 23               |
| Ni <sub>0.33</sub> Co <sub>0.67</sub> (OH) <sub>2</sub> /NF | 1 M KOH +<br>0.5 M methanol       | formate                          | 1.50                                       | 24               |
| Os-Ni <sub>x</sub> P/N-C/NF                                 | 1 M KOH +<br>1 M methanol.        | formate                          | 1.43                                       | 25               |
| NiAl-LDH-NS <sub>s</sub>                                    | 1 M KOH +<br>1 M ethanol          | formate                          | 1.72                                       | 26               |
| Co-S-P/CC                                                   | 1 M KOH +<br>1 M ethanol          | acetic acid                      | 1.63                                       | 27               |

## References

1. Z. Y. Duan, T. L. Ren, Q. Q. Mao, H. J. Yu, K. Deng, Y. Xu, Z. Q. Wang, L. Wang and H. J. Wang, *Journal of Materials Chemistry A*, 2022, **10**, 18126-18131.
2. Y. Guo, X. Yang, X. Liu, X. Tong and N. Yang, *Advanced Functional Materials*, 2023, **33**, 2209134.
3. K. Xiang, D. Wu, X. H. Deng, M. Li, S. Y. Chen, P. P. Hao, X. F. Guo, J. L. Luo and X. Z. Fu, *Advanced Functional Materials*, 2020, **30**, 1909610.
4. Z. S. Lin, S. L. Liu, Y. G. Liu, Z. Liu, S. D. Zhang, X. F. Zhang, Y. Tian and Z. H. Tang, *Journal of Power Sources*, 2021, **514**, 230600.
5. Y. X. Gao, Z. Chen, Y. Zhao, W. L. Yu, X. L. Jiang, M. S. He, Z. J. Li, T. Y. Ma, Z. X. Wu and L. Wang, *Applied Catalysis B: Environmental*, 2022, **303**, 120879.
6. Y. J. Wang, J. K. Wang, T. P. Xie, Q. Y. Zhu, D. Zeng, R. Li, X. D. Zhang and S. L. Liu, *Applied Surface Science*, 2019, **485**, 506-512.
7. C. Wang and L. Qi, *Angew Chem Int Ed Engl*, 2020, **59**, 17219-17224.
8. Y. B. Jeong and S. Hoon Ahn, *Chemical Engineering Journal*, 2022, **437**, 135322.
9. Q. Q. Chen, X. Yang, C. C. Hou, K. Li and Y. Chen, *Journal of Materials Chemistry A*, 2019, **7**, 11062-11068.
10. W. D. Ao, C. G. Cheng, H. J. Ren, Z. S. Fan, P. Q. Yin, Q. Qin, Z. N. Chen and L. Dai, *ACS Applied Materials & Interfaces*, 2022, **14**, 45042-45050.
11. X. Y. Chen, J. W. Wan, J. Wang, Q. H. Zhang, L. Gu, L. R. Zheng, N. Wang and R. B. Yu, *Advanced Materials*, 2021, **33**, 2104764.



12. B. Lu, L. Guo, F. Wu, Y. Peng, J. E. Lu, T. J. Smart, N. Wang, Y. Z. Finfrock, D. Morris, P. Zhang, N. Li, P. Gao, Y. Ping and S. Chen, *Nature Communications*, 2019, **10**, 631.
13. F. d. C. Romeiro, A. S. Martins, J. A. L. Perini, B. C. e. Silva, M. V. B. Zanoni and M. O. Orlandi, *Journal of Materials Science*, 2023, **58**, 3508-3519.
14. Y. X. Sun, A. J. Huang, Z. J. Li, Y. Q. Fu and Z. G. Wang, *Electrocatalysis*, 2022, **13**, 494-501.
15. P. J. Wang, Y. T. Yan, P. C. Wang, Z. Y. Ye, X. H. Zheng and W. Cai, *Chemical Engineering Journal*, 2023, **455**, 140856.
16. Y. Song, J. Cheng, J. Liu, Q. Ye, X. Gao, J. Lu and Y. Cheng, *Applied Catalysis B: Environmental*, 2021, **298**, 120488.
17. C. Li, S. H. Kim, H. Y. Lim, Q. Sun, Y. Jiang, H. J. Noh, S. J. Kim, J. Baek, S. K. Kwak and J. B. Baek, *Advanced Materials*, 2023, **35**, 01369.
18. A. Meena, M. Ha, S. S. Chandrasekaran, S. Sultan, P. Thangavel, A. M. Harzandi, B. Singh, J. N. Tiwari and K. S. Kim, *Journal of Materials Chemistry A*, 2019, **7**, 15794-15800.
19. Q. Hong, Y. M. Wang, R. R. Wang, Z. L. Chen, H. Y. Yang, K. Yu, Y. Liu, H. Huang, Z. H. Kang and P. W. Menezes, *Small*, 2023, **19**, 2206723.
20. C. Li, H. Wen, P. P. Tang, X. P. Wen, L. S. Wu, H. B. Dai and P. Wang, *ACS Applied Energy Materials*, 2018, **1**, 6040-6046.
21. Y. Guo, X. B. Yang, X. C. Liu, X. L. Tong and N. J. Yang, *Advanced Functional Materials*, 2023, **33**, 2209134.
22. J. Hao, J. W. Liu, D. Wu, M. X. Chen, Y. Liang, Q. Wang, L. Wang, X. Z. Fu and J. L. Luo, *Applied Catalysis B: Environmental*, 2021, **281**, 119510.

23. C. L. Xiao, S. N. Li, X. Y. Zhang and D. R. MacFarlane, *Journal of Materials Chemistry A*, 2017, **5**, 7825-7832.
24. M. Li, X. Deng, K. Xiang, Y. Liang, B. Zhao, J. Hao, J. L. Luo and X. Z. Fu, *ChemSusChem*, 2020, **13**, 914-921.
25. Z. Y. Duan, T. L. Ren, Q. Q. Mao, H. J. Yu, K. Deng, Y. Xu, Z. Q. Wang, L. Wang and H. J. Wang, *Journal of Materials Chemistry A*, 2022, **10**, 18126-18131.
26. L. Xu, Z. Wang, X. Chen, Z. K. Qu, F. Li and W. S. Yang, *Electrochimica Acta*, 2018, **260**, 898-904.
27. S. Sheng, K. Ye, L. N. Sha, K. Zhu, Y. Y. Gao, J. Yan, G. L. Wang and D. X. Cao, *Inorganic Chemistry Frontiers*, 2020, **7**, 4498-4506.
